# Supplementary material
Source: PubMed Central journal article supplement (PMC8356030)
Supplement: Supp_Figs1-2.pdf [file Supp_Figs1-2.pdf]

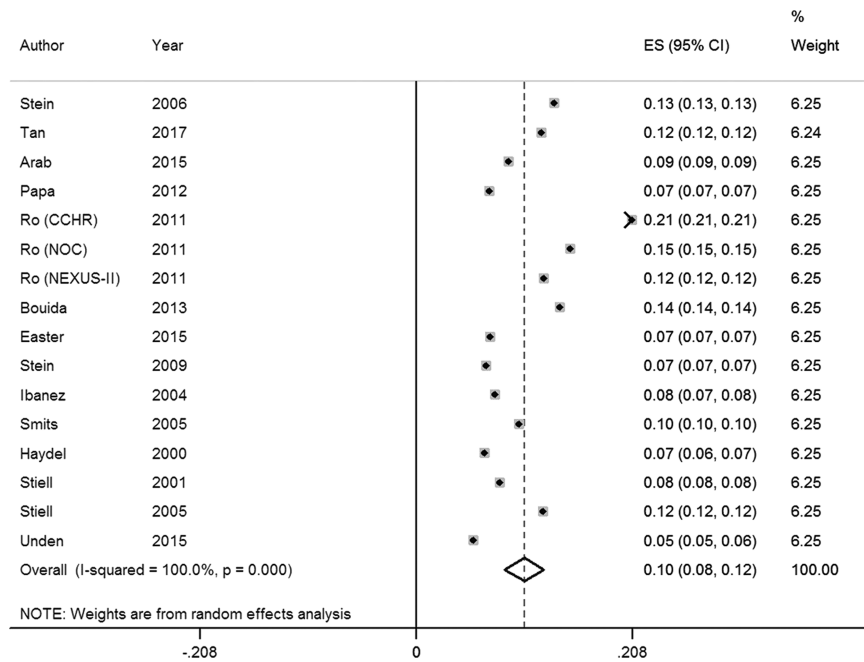

**SUPPLEMENTARY FIG. S1.** Meta-analysis of observational studies reporting prevalence of intracranial lesion in mild traumatic brain injury. Each study receives a weight (1/variance). The diamond at the bottom represents the pooled mean, and its lateral corners mark the 95% confidence interval (CI).

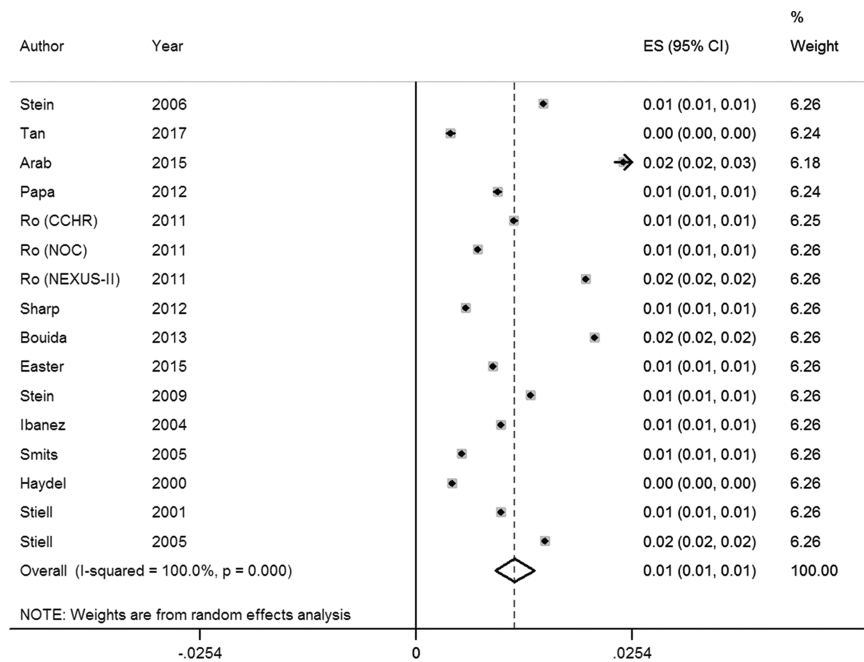

**SUPPLEMENTARY FIG. S2.** Meta-analysis of observational studies reporting prevalence of intracranial and surgical lesions in mild traumatic brain injury. Each study receives a weight (1/variance). The diamond at the bottom represents the pooled mean; its lateral corners mark the 95% confidence interval (CI).
