# Supplementary material
Source: PubMed Central journal article supplement (PMC8356030)
Supplement: Supp_Figs3-4.pdf [file Supp_Figs3-4.pdf]

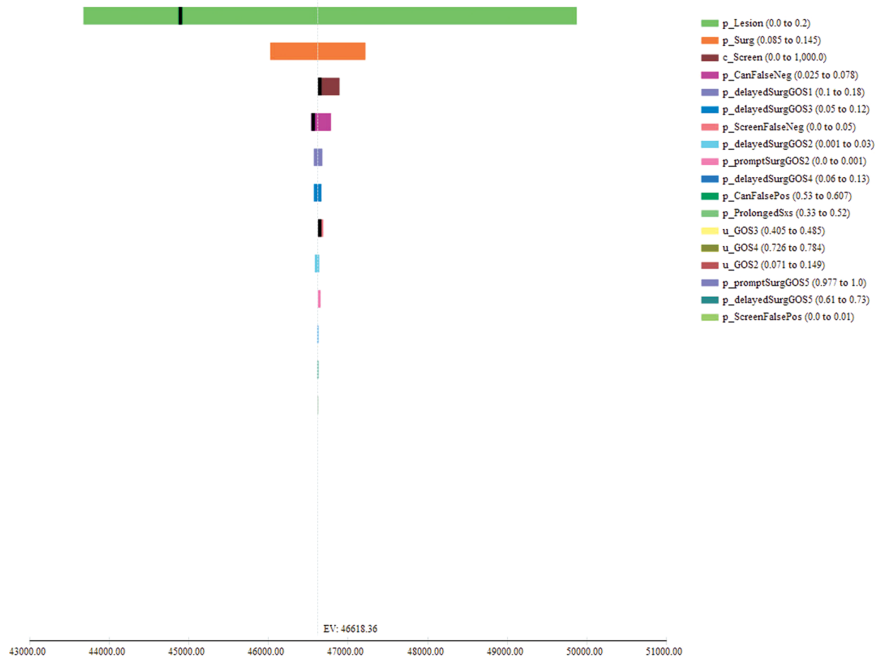

**SUPPLEMENTARY FIG. S3.** One-way sensitivity analysis of predictive variables in mild traumatic brain injury. When the individual variables are varied between their 95% confidence intervals and arranged with those having the greatest impact on cost-effectiveness at the top, the diagram takes on the appearance of a tornado. We concentrated on the high-impact variables in the two- and three-way sensitivity analyses.

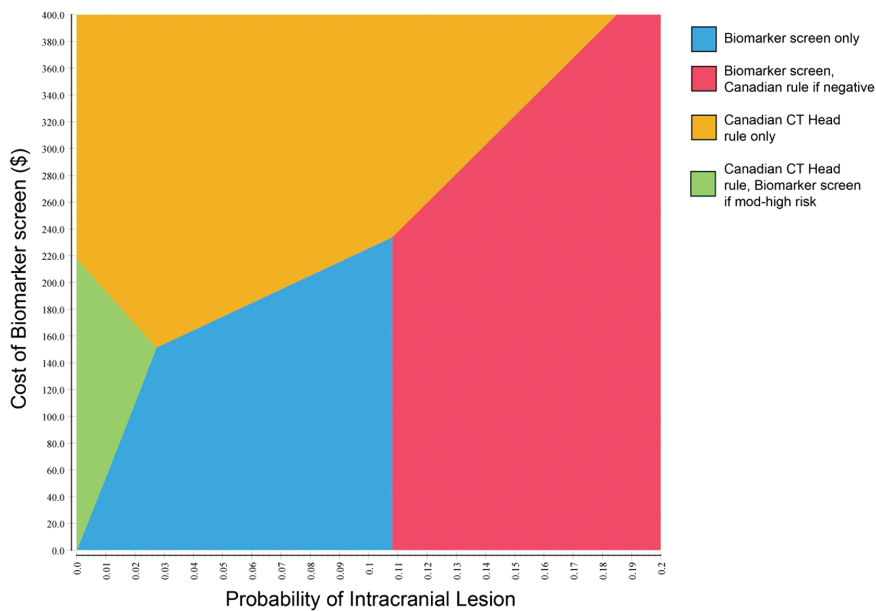

**SUPPLEMENTARY FIG. S4.** Three-way sensitivity analysis in mild traumatic brain injury. All is identical to Figure 5, except the likelihood of an intracranial lesion needing surgery in 0.085.
