# Supplementary material
Source: PubMed Central journal article supplement (PMC8356030)
Supplement: Supp_Figs5-6.pdf [file Supp_Figs5-6.pdf]

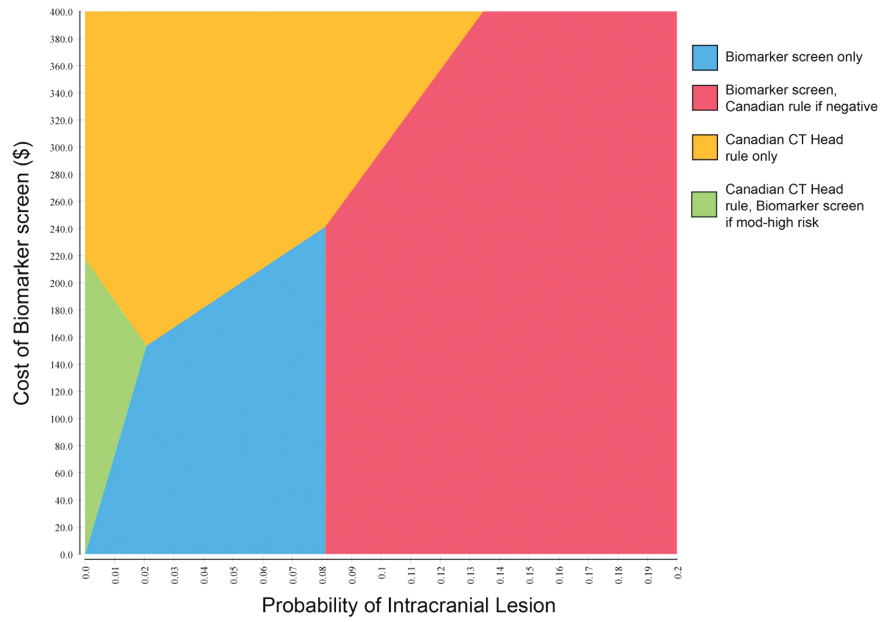

**SUPPLEMENTARY FIG. S5.** Three-way sensitivity analysis in mild traumatic brain injury. This is identical to Figure 5, in which the likelihood of an intracranial lesion needing surgery in 0.115.

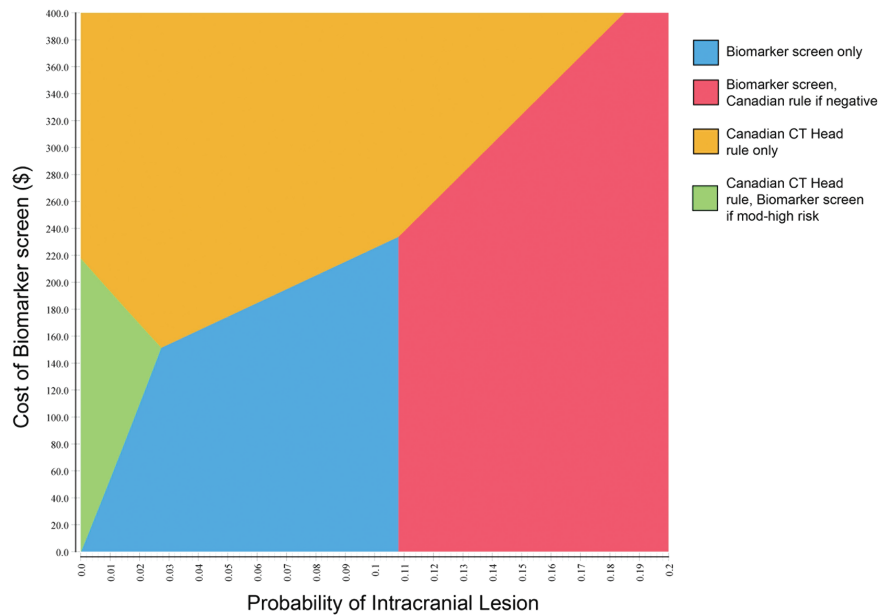

**SUPPLEMENTARY FIG. S6.** Three-way sensitivity analysis in mild traumatic brain injury. All is identical to Figure 5, except the likelihood of an intracranial lesion needing surgery in 0.145.
